1 **Multi-Trait Machine and Deep Learning Models for Genomic Selection using Spectral**  
2 **Information in a Wheat Breeding Program**

3

4 Karansher S. Sandhu<sup>1</sup>, Shruti S. Patil<sup>2</sup>, Michael O. Pumphrey<sup>1</sup>, Arron H. Carter<sup>1\*</sup>

5

6 <sup>1</sup> Department of Crop and Soil Sciences, Washington State University, Pullman, WA, USA,  
7 99164

8 <sup>2</sup> School of Electrical Engineering and Computer Science, Washington State University,  
9 Pullman, WA, USA, 99164

10

11 **\* Correspondence:**

12 Dr. Arron H. Carter

13 [ahcarter@wsu.edu](mailto:ahcarter@wsu.edu)

14

15 **Abbreviations**

16 ARI: anthocyanin reflectance index

17 CNN: convolutional neural network

18 GBLUP: genomic best linear unbiased predictor

19 GEBVs: genomic estimated breeding values

20 GNDVI: green normalized difference vegetation index

21 GS: genomic selection

22 MLP: multilayer perceptron

23 MT: multi-trait

24 NCPI: normalized chlorophyll pigment ratio index

25 NDVI: normalized difference vegetation index

26 NWI: normalized water index

27 PRI: photochemical reflectance index

28 RF: random forest

29 SVM: support vector machine

30 UT: uni-trait

31

## 32 **Abstract**

33 Prediction of breeding values and phenotypes is central to plant breeding and has been  
34 revolutionized by the adoption of genomic selection (GS). Use of machine and deep learning  
35 algorithms applied to complex traits in plants can improve prediction accuracies in the context of  
36 GS. Spectral reflectance indices further provide information about various physiological  
37 parameters previously undetectable in plants. This research explores the potential of multi-trait  
38 (MT) machine and deep learning models for predicting grain yield and grain protein content in  
39 wheat using spectral information in GS models. This study compares the performance of four  
40 machine and deep learning -based uni-trait (UT) and MT models with traditional GBLUP and  
41 Bayesian models. The dataset consisted of 650 recombinant inbred lines from a spring wheat  
42 breeding program, grown for three years (2014-2016), and spectral data were collected at  
43 heading and grain filling stages. MT-GS models performed 0-28.5% and -0.04-15% superior to  
44 the UT-GS models for predicting grain yield and grain protein content. Random forest and  
45 multilayer perceptron were the best performing machine and deep learning models to predict  
46 both traits. These two models performed similarly under UT and MT-GS models. Four explored  
47 Bayesian models gave similar accuracies, which were less than machine and deep learning-based  
48 models, and required increased computational time. Green normalized difference vegetation  
49 index best predicted grain protein content in seven out of the nine MT-GS models. Overall, this  
50 study concluded that machine and deep learning-based MT-GS models increased prediction  
51 accuracy and should be employed in large-scale breeding programs.

52

## 53 **Core Ideas**

- 54 1. Potential for combining high throughput phenotyping, machine and deep learning in  
55 breeding.
- 56 2. Multi-trait models exploit information from secondary correlated traits efficiently.
- 57 3. Spectral information improves genomic selection models.
- 58 4. Deep learning can aid plant breeders owing to increased data generated in breeding  
59 programs

60

## 61 **Introduction**

62 Quantitative genetics theory was proposed by Sir Ronald Fisher a century ago and established  
63 the infinitesimal model (Fisher, 1918). This theory was developed without the direct use of  
64 genotypic data and persisted for decades. With the advent of sufficient genome-wide markers  
65 paired with an infinitesimal model of quantitative genetics theory, Meuwissen et al. (2001) were  
66 the first to propose the term genomic selection (GS) for predicting breeding values in animals  
67 and plants. GS uses estimates of marker effects based on model development from a related  
68 population genotyped and phenotyped for the trait of interest. The genome-wide marker effects  
69 are then used for predicting the genomic estimated breeding values (GEBVs) of a new  
70 population, which is only genotyped (Heffner et al., 2010). GS has been extensively researched  
71 in plant breeding, focusing on optimizing marker density, training population size, family  
72 relatedness, heritability of the trait, and GS model utilized (Shengqiang et al., 2009). Most of the  
73 GS models evaluated in plant breeding have been uni-trait (UT), where single traits are predicted  
74 (Lozada & Carter, 2019; Sun et al., 2019). Recently, breeders have moved to adopt multi-trait  
75 (MT) GS models because predictions are required for multiple traits simultaneously and their  
76 combination may improve prediction accuracies (Jia & Jannink, 2012).

77 MT-GS models leverage shared genetic information between correlated traits (Jia &  
78 Jannink, 2012) to predict various traits simultaneously by utilizing the same set of predictors,  
79 assuming the presence of some structure in the captured output (Bhatta et al., 2020). Improved  
80 prediction accuracy of MT-GS models over UT-GS is attributed to the correlation among the  
81 training population and between the traits. Furthermore, MT-GS models are more interpretable  
82 and require less computational time than a series of UT-GS models (Montesinos-López et al.,  
83 2018a). MT models are intensively employed in other fields such as data mining, forest  
84 management, energy forecasting, and ecological modelling (Voyant et al., 2017). Jia & Jannink  
85 (2012) showed that prediction accuracy improved for primary traits with low heritability in  
86 barley (*Hordeum vulgare* L.) when a secondary correlated trait is used in MT-GS models. Sun et  
87 al. (2019) demonstrated the increase in GS prediction accuracy for wheat (*Triticum aestivum* L.)  
88 grain yield when secondary traits such as normalized difference vegetation index (NDVI) and  
89 canopy temperature were included in MT-GS models. Bhatta et al. (2020) compared UT- and  
90 MT-GS models for predicting end-use quality traits in barley and concluded that MT-GS models  
91 have better performance under both within and across environment predictions. Mixed model  
92 approaches utilizing Bayesian and genomic best linear unbiased predictor (GBLUP) are most  
93 commonly used in plant breeding programs (Endelman, 2011; Pérez & Campos, 2014).

94 GBLUP is a frequently used MT-GS models in plant breeding, which uses marker-based  
95 relationship matrix for predicting the performances of genotypes (Endelman, 2011; VanRaden,  
96 2008). Several Bayesian MT-GS models (Bayes A, Bayes Lasso, Bayes B, and Bayes Cpi) are  
97 also available, which assume a prior distribution during the training process, and hence separate  
98 models are required to optimize different traits (Pérez & Campos, 2014). Bayes Lasso follows  
99 the double exponential prior distribution for performing the continuous shrinkage and variable

100 selection (Tishbirani, 1996). Additionally, Bayes Lasso applies a long tail student t distribution  
101 to the marker effects. Bayes A, Bayes B, and Bayes Cpi use the scaled-t, gaussian mixture (point  
102 mass at zero with gaussian distribution), and scaled-t mixture (point mass at zero with scaled-t  
103 distribution) prior distribution, respectively, during the model training (Pérez & Campos, 2014).  
104 These models assume that all markers do not contribute to the total genetic variance. Bayesian  
105 models are also computationally intensive due to Monte Carlo Markov Chain utilization for  
106 estimating the marker effects. Bayesian models are known as parametric due to the assumption  
107 of the prior relationship among features and predictors, which do not model gene by gene and  
108 higher-order interactions during the estimation of marker effects (Gianola et al., 2006;  
109 Montesinos-López et al., 2019). Hence, recently developed machine and deep learning tools  
110 provide an opportunity for the selection of the GS model.

111         The increasing adoption of high throughput genotyping and phenotyping tools by plant  
112 breeders has increased data generation tremendously, which requires the adoption of analytical  
113 methods used in other disciplines for complex datasets. Machine and deep learning models have  
114 been explored in previous studies for prediction in UT-GS models and have demonstrated mixed  
115 results (Bellot et al., 2018; Ma et al., 2017). Random forest (RF) and support vector machine  
116 (SVM) are commonly used ensemble machine learning models for the GS context. RF is an  
117 ensemble machine learning tool used for predicting the output by averaging the results of an  
118 extensive collection of identically distributed decision trees applied to bootstrapped samples of  
119 the training data. RF is better than the other tree-based methods like decision tree regression and  
120 bagging, as it tries to reduce the correlation between the subsets of tree by averaging results from  
121 those trees for final predictions. The reduction of correlation among the independent trees and  
122 averaging performance of the trees aids in reducing overfitting and increasing the prediction

123 accuracy. The important hyperparameters for RF model training include the number of trees, the  
124 number of features sampled for each iteration, the importance of each feature, and the depth of  
125 the trees (Hastie et al., 2009). SVM provides flexibility for fitting the model as it fits the best  
126 regression line by allowing a specific acceptable error in the model. Optimization of SVM  
127 models requires finding a regression line that deviates from the real line by no greater than a  
128 value called maximum error ( $\epsilon$ ), and at the same time the line should be flat as possible (Smola  
129 & Scholkopf, 2004).

130         Deep learning is the branch of machine learning that uses an artificial neural network as a  
131 prediction tool, and needs to be explored in GS owing to the plethora of data accumulated in  
132 breeding programs (Lecun et al., 2015; Samuel, 2001). Deep learning models explore the  
133 relationship between input and output variables using a combination of neurons and hidden  
134 layers to form a network similar to the biological network of neurons in the human brain. Deep  
135 learning models use different non-linear activation functions with a large number of layers, and  
136 data is transformed along with each layer to obtain the best fit for different genetic architectures  
137 (Angermueller et al., 2016). Often used deep learning models in plant breeding are multilayer  
138 perceptron (MLP) and convolutional neural network (CNN) (Pérez-Enciso & Zingaretti, 2019).  
139 Optimization of hyperparameters is required to achieve the best deep learning model  
140 performance, which is the most computationally intensive step (McKay, 1992). The most  
141 essential hyperparameters include the type of activation function, activation rate, regularization  
142 parameter, number of epochs, number of hidden layers, dropout, and stopping criteria (Pérez-  
143 Enciso & Zingaretti, 2019). Hyperparameters can be selected by using one of the four methods,  
144 namely grid search, latin hypercube sampling, random search, and optimization (McKay, 1992).

145 MLP is considered a feed-forward neural network, and consists of three input, hidden,  
146 and output layers. The first layer is the input layer, which receives the DNA marker information.  
147 Each neuron of the hidden layers has its characteristic weight and transforms the previous layer's  
148 data using various linear and non-linear activation functions (Lecun et al., 2015). The weight  
149 parameters and other hyperparameters are optimized using the training data using either  
150 backpropagation or stochastic gradient (Cho & Hegde, 2019). The number of the output layer is  
151 equal to the total number of response variables, depending upon the tested model. The output of  
152 a layer also depends upon the weighted average transformation of neurons from the previous  
153 layer with associated bias. CNN is a special type of neural network used for input features  
154 having a specific pattern, such as linkage disequilibrium among markers distributed along a  
155 linear chromosome. The hidden layer in MLP is replaced with multiple layers in CNN, such as  
156 convolutional, pooling, fully connected, and dense layers (Lecun et al., 2015). As opposed to  
157 neurons, CNN uses the kernels or filters in convolution layers for capturing the hidden  
158 information. A filter consists of predefined marker interval windows having the same weights.  
159 This filter is moved continuously across the input data for obtaining the weight for each window  
160 for computing the locally weighted sum. The pooling layer follows the first convolutional layer  
161 and is used for dimensionality reduction (Pérez-Enciso & Zingaretti, 2019). This layer merges  
162 the output of filters from the convolutional layer using either mean, minimum, or maximum to  
163 smoothen the results. Dropout and activation functions are employed after the convolutional and  
164 pooling layer (Pook et al., 2020).

165 High-throughput phenotyping applications include spectral reflectance values obtained  
166 from plants to provide information about various physiological processes and have been used in  
167 wheat (Babar et al., 2006), rice (*Oryza sativa* L.; Zheng et al., 2018) maize (*Zea mays* L.; Aguete

168 et al., 2017), barley (Barmeier et al., 2017), and sorghum (*Sorghum bicolor* L.; Habyarimana et  
169 al., 2020). Different vegetation indices or spectral reflectance indices (SRI) can be extracted by  
170 measuring reflection from plants. These SRI aid in the indirect selection of primary traits (grain  
171 yield or grain protein content) in wheat due to their moderate to high genetic correlation and high  
172 heritability compared to primary traits (Crain et al., 2018). Commonly utilized indices are NDVI,  
173 photochemical reflectance index (PRI), normalized water index (NWI), and green-NDVI  
174 (GNDVI), which provide information about plant biomass, photochemical pigments, plant water  
175 stress, and nitrogen status (Gitelson et al., 1996; Peñuelas et al., 1994). These indices have been  
176 used in covariate and MT-GS models to predict grain yield in wheat and demonstrate  
177 improvement in prediction accuracy (Lozada & Carter, 2019; Sun et al., 2019). To the best of our  
178 knowledge, deep learning models have not been explored for MT-GS in wheat for predicting  
179 grain yield and grain protein content using spectral information as secondary traits.

180 SRI derived from wheat has been reported to correlate to grain yield, biomass, and  
181 drought tolerance in spring wheat (Gizaw et al., 2018). Grain yield and grain protein content are  
182 important selection traits in spring wheat breeding programs and are complicated by the negative  
183 correlation between them. However, GS and SRI provide an alternative for selecting these two  
184 traits simultaneously. Our previous study observed that inclusion of secondary correlated traits  
185 results in improved prediction accuracy for grain yield and grain protein content by using the  
186 rrBLUP GS model. Grain protein content and grain yield were accurately predicted when  
187 spectral data was collected at heading and grain filling stages, respectively (Sandhu et al.,  
188 2021b). Similarly, we observed that deep learning based GS models improve prediction accuracy  
189 by 3-5% in different agronomic traits in wheat (Sandhu et al., 2021a). The main objectives of  
190 this study were to 1) Optimize different MT machine and deep models for predicting grain yield



191 and grain protein content in wheat, 2) Compare the performance of MT-GS and UT-GS models,  
192 and 3) Compare the performances of MT-GS mixed models with machine and deep models  
193 under cross-validation and independent validation scenarios.

194

## 195 **Materials and Methods**

196 **Field data and plant material:** The data set used in this study consisted of 650 recombinant  
197 inbred lines from a nested association mapping population of spring wheat (Blake et al., 2019).  
198 The field trial was planted for three years (2014-2016) at Spillman Agronomy Farm, Pullman,  
199 WA. For detailed information about the population, field trials, and traits evaluated see Sandhu  
200 et al. (2021a,b). In brief, field trials were planted in a modified augmented design with 15-20%  
201 of the plots assigned to three replicated check cultivars. Grain protein content (%) and grain yield  
202 (t/ha) was collected using a Perten DA 700 NIR analyzer (Perkin Elmer, Sweden) and  
203 Wintersteiger Nursery Master combine (Ried im Innkreis, Austria).

204 Spectral reflectance at 16 different bands between the 430 and 980 nm wavelengths was  
205 collected with a handheld CROPSCAN multi-spectral radiometer at heading (Feekes growth  
206 stages 10.1) and grain filling stages (Feekes growth stages 11.1) (Large, 1954). Data from the  
207 CROPSCAN was processed with CROPSCAN MSR software, and six different SRI were  
208 derived. These indices were NDVI, PRI, NWI, anthocyanin reflectance index (ARI), normalized  
209 chlorophyll pigment ratio index (NCPI), and GNDVI (Peñuelas et al., 1994; Prasad et al., 2007;  
210 Rouse et al., 1972). Detailed information about these SRI and the physiological traits they  
211 explain is provided in **Supplementary Table 1**.

212

213 **Genotyping:** The population was genotyped using genotyping by sequencing and Illumina 90K  
214 SNP chip array (Poland & Rife, 2012). Initial genotyping data consisted of 73,345 high-quality  
215 polymorphic markers anchored to the Chinese Spring RefSeqv1 reference map (Jordan et al.,  
216 2018). Detailed procedure about genotyping, SNP calling, map construction, and filtration is  
217 described in previous publications (Sandhu et al., 2021a). Quality filtering involved removing  
218 monomorphic markers and markers missing more than 20% of the genotyping data. RILs  
219 missing phenotyping data in one environment and 10% genotyping data were discarded. Finally,  
220 a minor allele of  $< 0.05$  was used, resulting in 635 RILs having 40,038 polymorphic markers.

221  
222 **Statistical analysis:** Adjusted means for grain yield, grain protein content, and SRI were  
223 obtained using residuals derived separately for each environment using the ‘lme4’ function  
224 implemented in the R program using the model:

$$225 Y_{ij} = \text{Block}_i + \text{Check}_j + \text{residuals}_{ij}$$

226 Where  $Y_{ij}$  is the phenotypic values of the trait,  $\text{Check}_j$  is the fixed effect of  $j$ th replicated check  
227 cultivars, and  $\text{Block}_i$  is the fixed effect of the  $i$ th block. Residuals were used for obtaining the  
228 adjusted means for all the evaluated phenotypic traits (Bates et al., 2015).

229 Broad sense heritability was extracted using augmented randomized complete block design  
230 implemented in R (Aravind et al., 2020) with the model:

$$231 Y_{ij} = \mu + \text{Block}_i + \text{Check}_j + \text{Gen}_{j(i)} + e_{ij}$$

232

233 Where  $Y_{ij}$ ,  $\text{Block}_i$ , and  $\text{Check}_j$  are defined above,  $\text{Gen}_{j(i)}$  is the random effect of the unreplicated  
234 genotype nested within the  $i$ th block and follows the distribution  $\text{Gen}_j \sim N(0, \sigma_g^2)$ , and  $e_{ij}$  is the  
235 standard normal error distributed as  $e_{ij} \sim N(0, \sigma_e^2)$ .

236

237 Genetic correlation between primary traits (grain yield or grain protein content) and secondary  
238 traits (individual SRI) are calculated using multivariate models, represented as

$$\begin{bmatrix} y_A \\ y_B \end{bmatrix} = \begin{bmatrix} X_A & 0 \\ 0 & X_B \end{bmatrix} \begin{bmatrix} b_A \\ b_B \end{bmatrix} + \begin{bmatrix} Z_A & 0 \\ 0 & Z_B \end{bmatrix} \begin{bmatrix} g_A \\ g_B \end{bmatrix} + \begin{bmatrix} \epsilon_A \\ \epsilon_B \end{bmatrix}$$

239 Where  $y_A$  and  $y_B$  are the BLUPs for the primary (A) and secondary (B) traits,  $X$  and  $Z$  denote the  
240 design matrix for the fixed and random effect, and  $b$  is the fixed effects,  $g$  is the random genetic  
241 effects, and  $e$  is the residuals for each trait. Variance components were calculated assuming  $\begin{bmatrix} g_A \\ g_B \end{bmatrix}$   
242  $\sim N(0, H \otimes G)$ , where  $G$  is the genomic relationship matrix,  $H$  is the genetic variance-covariance  
243 matrix, and  $\begin{bmatrix} \epsilon_A \\ \epsilon_B \end{bmatrix} \sim N(0, I \otimes R)$ , where  $R$  is the residual variance-covariance matrix, and  $I$  is the  
244 identity matrix. The genetic correlation was obtained as

$$r_G = \frac{\text{cov}(A, B)}{\sqrt{\text{var}(A) \cdot \text{var}(B)}}$$

245 Where  $\text{Var}(A)$ , and  $\text{Var}(B)$  represents the genetic variance of the primary and secondary traits  
246 individually and  $\text{cov}(A, B)$  is the covariance between primary and secondary traits. The complete  
247 multivariate analysis was performed using a multivariate approach in JMP genomics (SAS  
248 Insitute Inc. 2011).

249

## 250 **Genomic prediction models:**

251 **Genomic best linear unbiased predictor (GBLUP):** The UT-GS GBLUP is defined as

$$y = \mu + Zg + e$$

252 where  $y$  is the phenotype of interest (grain yield or grain protein content),  $\mu$  is the overall mean,  
253  $Z$  is the design matrix linking genotypes to the breeding values,  $g$  is the vector of genomic  
254 breeding values, and  $e$  is the random residuals. It is assumed that  $g \sim N(0, G\sigma_g^2)$ , where  $G$  is  
255 genomic relationship matrix,  $\sigma_g^2$  is the additive genetic variation, and  $e \sim N(0, I\sigma_e^2)$  with  $\sigma_e^2$  as  
256 residual variance and  $I$  is the identity matrix. The MT-GS is represented as

$$\begin{bmatrix} y_A \\ y_B \end{bmatrix} = \begin{bmatrix} X_A & 0 \\ 0 & X_B \end{bmatrix} \begin{bmatrix} b_A \\ b_B \end{bmatrix} + \begin{bmatrix} Z_A & 0 \\ 0 & Z_B \end{bmatrix} \begin{bmatrix} g_A \\ g_B \end{bmatrix} + \begin{bmatrix} \epsilon_A \\ \epsilon_B \end{bmatrix}$$

257 Where  $y_A$  and  $y_B$  represent the primary and secondary traits,  $X$  and  $Z$  are the design matrix  
258 associating the fixed and random effects,  $b$  is the vector of means for primary and secondary  
259 traits,  $g$  and  $e$  are the vector for random genetic and residual effects. It is assumed as  $\begin{bmatrix} g_A \\ g_B \end{bmatrix} \sim N(0,$   
260  $H \otimes G)$ , where  $G$  is the genomic relationship matrix,  $H$  is the variance-covariance matrix for the  
261 two traits, and  $\begin{bmatrix} \epsilon_A \\ \epsilon_B \end{bmatrix} \sim N(0, I \otimes R)$ ,  $R$  is the residual variance-covariance matrix between two  
262 traits (Endelman, 2011; VanRaden, 2008). In all the MT-GS models, individual SRI were  
263 included as secondary correlated traits.

264

265 **Bayesian models:** As GBLUP uses the relationship matrix for estimating genotypes effects, in  
266 this study we also explored the Bayes Lasso, Bayes A, Bayes B, and Bayes Cpi in UT- and MT-  
267 GS models, which consider different prior distributions. The UT-GS model is represented as

$$y_i = \mu + \sum_{j=1}^{j=p} x_{ij}\beta_j + \epsilon_i$$

268 where  $y_i$  is the phenotype of interest (grain yield or grain protein content),  $\mu$  is the overall mean,  
269  $\beta_j$  is the  $j$ th marker effect,  $x_{ij}$  is the value of the  $j$ th SNP in the  $i$ th individual, and  $\epsilon_i$  is residual

270 error. The conditional prior distribution was separate for each of the Bayesian models employed  
271 in this study. For Bayes A, the prior distribution is  $\epsilon_i \sim N(0, \sigma^2)$  with  $\sigma^2 \sim \chi^{-2}(\sigma^2/df, S)$  for  
272 residuals, and  $\beta_j \sim \chi^{-2}(df_\beta, S_\beta)$  for genotypic values. Initial values for the degrees of freedom for  
273 the t distribution was set to four and  $S$  was calculated as  $S = var(y) * 0.4$  as suggested by Pérez &  
274 Campos (2014). Analysis was performed using BGLR and MTM packages (Campos &  
275 Grüneberg, 2016) with 20,000 Monte Carlo Markov Chain iterations, and 5,000 burn in  
276 iterations.

277  
278 The MTM package was used for fitting MT Bayesian models estimating unstructured variance-  
279 covariance between traits. The model is represented as

$$y = \mu + Zu + \epsilon$$

280 Where  $y$  is the vector of primary and secondary phenotypic traits,  $\mu$  is the mean vector for all  
281 traits,  $u$  is the predicted genotypic values for all traits with distribution as  $u \sim N(0, H \otimes G)$ ,  
282 where  $G$  is relationship matrix,  $H$  is the variance-covariance matrix, and  $\epsilon$  is vector of residuals  
283 and distributed as  $\epsilon \sim N(0, I \otimes R)$ , where  $I$  is the identity matrix and  $R$  is the variance-covariance  
284 matrix for the residuals (Montesinos-López et al., 2016).

285  
286 **Random forests (RF):** In RF bootstrap sampling, a subset of features was selected randomly as  
287 predictors for splitting the tree nodes. Each tree is chosen for lowering the loss function in the  
288 final prediction (Smith et al., 2013). The RF model can be represented as

$$\hat{y}_i = \frac{1}{B} \sum_{b=1}^B T_b(x_i)$$

289 Where  $\hat{y}_i$  is the predicted value of the individual with genotype  $x_i$ ,  $B$  is the number of bootstrap  
290 samples, and  $T$  is the total number of trees. RF is computationally less intensive, as each tree is  
291 independent of each other and can be computed on different units or nodes (Waldmann, 2016).

292 The working of the RF can be grouped into four main steps:

- 293 1. Bootstrap sampling is used to select the individual plant  $i$  ( $y_i, x_i$ ) with replacement. The  
294 sampled individual can appear several times or not, mainly bootstrap sampled  $b = (1, \dots,$   
295  $B)$ .
- 296 2. Selection is performed for the number of features (max features) or input variables at  
297 random ( $SNP_j, j = (1, \dots, J)$ ), and the best set of features are selected that minimize the  
298 loss function obtained as MSE.
- 299 3. Splitting is performed at each node into two new subsets (child nodes) for the genotype  
300 of  $SNP_j$ .
- 301 4. Steps 2 and 3 are repeated for each node until a minimum node or the specified max  
302 depth is reached. The final predicted value of an individual of genotype  $x_i$  is the average  
303 of the values predicted by the decision trees in the forest.

304 The important hyperparameters for RF model training include the number of trees, the  
305 number of features sampled for each iteration, the importance of each feature, and the depth of  
306 the trees (Hastie et al., 2009). We used randomized and grid search cross-validation for selecting  
307 the best hyperparameter's combination. The combination used for grid search cross-validation  
308 after the randomized search was the number of trees (200, 300, 500, 1000), max features (auto,  
309 sqrt), and max depth (40, 60, 80, 100). The random forest regressor and Scikit learn libraries  
310 were used for analysis in Python 3.7 (Gulli and Pal, 2017).

311

312 **Support vector machine (SVM):** SVM uses kernel functions for mapping the input space into a  
313 high dimensional feature space using the relationship between phenotypes and marker genotype  
314 (Smola & Scholkopf, 2004). The relationship between the phenotype and genotype is given as

$$f(x) = wx + b$$

315 Where  $w$  is the unknown weight and  $b$  is the constant, reflecting the maximum allowed bias. The  
316 learning of function  $f(x)$  is performed by minimizing the loss function

$$C \sum_{i=1}^n L(e_i) + \frac{1}{2} \|w\|^2$$

317 Where  $e_i = y - f(x)$  is the associated error with the  $i^{th}$  training data point,  $\|w\|^2$  represents model  
318 complexity,  $C$  is a positive regularization parameter controlling the tradeoff between training  
319 error and model complexity, and  $L$  is the loss function (Vapnik, 2013). Herein, we selected the  $\epsilon$   
320 insensitive loss function for  $L$  and is represented as

$$L_{\epsilon}(e) = \begin{cases} 0 & \text{if } |e| < \epsilon \\ |e| - \epsilon & \text{otherwise} \end{cases}$$

321  $L$  (loss function) is zero if the absolute error is less than predefined  $\epsilon$ , while if absolute error is  
322 greater than  $\epsilon$ ,  $L$  is the difference between absolute error and  $\epsilon$ . Usually,  $\epsilon$  insensitive loss  
323 function is represented in term of slack variables ( $\xi \xi^*$ ). The resulting optimization equation can  
324 be represented as

$$325 \min_{w, b, \xi, \xi^*} (C \sum_{i=1}^n L(\xi \xi^*) + \frac{1}{2} \|w\|^2)$$

326 The solution to this minimization problem is of the form

$$f(x) = \sum_{i=1}^n \alpha_i x_i x_j + b$$

327 Where  $x_i x_j$  is the inner product of linear function. It was replaced with a non-linear kernel  
328 function, namely the gaussian radial basis function. The parameters  $C$ ,  $\xi$ , and kernel are  
329 optimized using cross-validation in the Scikit library (Pedregosa et al., 2011).

330

331 **Multilayer perceptron (MLP):** MLP is a feed-forward neural network consisting of three main  
332 layers, namely input, hidden, and output layers. A detailed representation of the MLP used is  
333 represented in **Figure 1A**, where the output of a layer depends upon the weighted average  
334 transformation of neurons from the previous layer with associated bias. The output of a hidden  
335 layer is represented as

$$336 \quad Z_i = b_{(i-1)} + W_i f_{(i-1)}(x)$$

337 Where  $Z_i$  is the output from the  $i^{th}$  hidden layer,  $W_i$  is the weight associated with the neurons,  $f_{(i-1)}$   
338 represents the activation function linking the associated weights and bias from the previous  
339 layer, and this process is repeated until the output layer. In the case of UT-GS models, the output  
340 layer is a vector of GEBVs, and in MT-GS, it contains two vectors having GEBVs and spectral  
341 information.

342 Hyperparameters were optimized for the MLP models using inner grid search cross-  
343 validation and the Keras function's internal capabilities. The grid search cross-validation used  
344 80% of the training data, where 80% of this dataset is used for optimizing the hyperparameters  
345 and the remaining 20% for validation using Keras independent split validation functions (Cho &  
346 Hegde, 2019). The hyperparameters that provided the least MSE on the validation set were  
347 selected, and later used on the testing set. Detailed information about the hyperparameter  
348 optimization is referred to in a previous publication (Sandhu et al., 2021a). All the MLP



349 algorithms were implemented in Python 3.7 using Keras and Scikit learn libraries (Gulli and Pal,  
350 2017).

351  
352 **Convolutional neural network (CNN):** CNN is a special case of neural network used for input  
353 features having a specific pattern. The complete layout for CNN is provided in **Figure 1B**. Initial  
354 values for the hyperparameters were based on previous findings on UT-GS models (Sandhu et  
355 al., 2021a). The CNN model used here consists of one input layer, two convolutional layers, two  
356 pooling layers, a dense layer, a flatten layer, two dropouts, and an output layer. Grid search  
357 cross-validation was used for selecting hyperparameters, namely, filters (16, 32, 64, 128),  
358 learning rate (0.01, 0.05, 0.1), activation function (logistic, linear, tanh, relu), batch size (64,  
359 128), epochs (150, 200), and solver (adam, sgd, lbfgs). These hyperparameters were selected  
360 based on previous findings and other studies (Waldmann et al., 2020). Early stopping, dropout,  
361 and regularization techniques were applied to control model overfitting. Early stopping involves  
362 stopping the training process as validation error reaches a minimum, using Keras-provided API  
363 (Callbacks) (Pedregosa et al., 2011). Dropout involves assigning a fixed set of training neurons  
364 with a weight to zero for controlling the overfitting and reducing complexity. We used a dropout  
365 rate of 0.2 during hyperparameter optimization in MLP and CNN based on Srivastava et al.  
366 (2014).

367  
368 **Cross-validation and independent prediction:** The performances of all nine UT- and MT-GS  
369 models were evaluated using five-fold cross-validation. During five-fold cross-validation, 80%  
370 of the data was used for model training, and the remaining 20% for model testing within each  
371 environment. Two hundred replications were used to assess the model's performance, and the

372 mean was reported as prediction accuracy. Each replication consisted of five model iterations,  
373 where the testing set was rotated for each iteration. Prediction accuracy was obtained as the  
374 Pearson correlation coefficient between actual (observed) phenotypic value and the calculated  
375 GEBVs. Instant accuracy was reported, which involves the average correlation coefficient of  
376 iterations. Comparisons were made between UT- and MT-GS models where a single SRI was  
377 included in the MT-GS model. Similarly, machine and deep learning-based MT-GS models were  
378 compared with their Bayesian and GBLUP counterparts. MT-GS models used six SRI  
379 individually in the model, and the best performing SRI was identified for each trait with different  
380 models.

381 Independent predictions were performed by training models on previous year(s) data and  
382 predicting the phenotype in future years. We tested the performance of both UT- and MT-GS  
383 with the inclusion of spectral information. In brief, the GS model trained on 2014 and 2015 data  
384 was used to predict the 2016 and similarly the model trained on 2014 data to predict the 2015  
385 environment. The GS analysis was computationally intensive, and this problem was resolved by  
386 working on Washington State Universities high speed computing cluster (<https://hpc.wsu.edu/>).

387

## 388 **Results**

389 **Phenotypic summary and heritability:** Average phenotypic values and heritabilities are  
390 provided for grain yield and grain protein content under three environments (**Table 1**). Grain  
391 yield and grain protein content had low and moderate heritability. The six SRI used in this study  
392 had moderate to high heritability (**Table 2**), and 2015 had the lowest heritability for phenotypic  
393 and spectral traits (**Table 1 and 2**). Phenotypic and genetic correlation between phenotypic traits  
394 and SRI was obtained at both heading and grain filling stages (**Table 3, Supplementary Table 2**

395 **and 3)**. Grain protein content and grain yield had a high and significant correlation with SRI  
396 collected at heading and grain filling stage (**Table 3 and Supplementary Table 2**).

397  
398 **Genomic selection using uni- and multi-trait models:** We evaluated nine different models  
399 (GBLUP, Bayes A, Bayes B, Bayes Cpi, Bayes Lasso, RF, SVM, MLP, and CNN) for predicting  
400 grain protein content and grain yield using five-fold cross-validation (**Figure 2 and 3**). A single  
401 SRI was included in each model for predicting both traits under MT-GS models and their  
402 average results are depicted for comparison with UT-GS models (**Figure 2 and 3**). In the case of  
403 grain yield, MT-GS models either gave an equal or higher prediction accuracy than UT-GS  
404 models (**Supplementary Table 4**). Furthermore, machine and deep learning models performed  
405 better than the traditional GBLUP and Bayesian models under UT and MT models. The  
406 improvement in prediction accuracy with MT-GS models for grain yield varied from 0 to 28.5%,  
407 with maximum improvement observed in the 2014 environment, and the lowest increase was  
408 observed for the 2015 environment (**Figure 2**). RF and MLP performed best for predicting grain  
409 yield under all the environments, closely followed by GBLUP (**Supplementary Table 4 and**  
410 **Figure 2**). Both models performed superior for UT- and MT-GS models compared to other  
411 machine and deep learning models. Four bayesian models, namely, Bayes A, Bayes B, Bayes  
412 Cpi, and Bayes Lasso, produced almost the same prediction accuracy for grain yield under the  
413 UT- and MT-GS models (**Supplementary Table 4 and Figure 2**). SVM resulted in the lowest  
414 prediction accuracy for grain yield and CNN observed the lowest increase under the MT-GS  
415 models (**Figure 2 and Supplementary Table 4**).

416 Similarly, MT-GS models increased prediction accuracy for grain protein content  
417 compared to UT-GS counterparts (**Figure 3 and Supplementary Table 4**). MLP and RF

418 performed superior to other models and gave similar accuracy under different scenarios (**Figure**  
419 **3 and Supplementary Table 4**). The performance of MT-GS models varied from -0.04 to 15%  
420 compared to the UT-GS models. Similar to grain yield, SVM performed poorest for UT- and  
421 MT-GS models to predict grain protein content. We observed similar trends in improvement in  
422 prediction accuracy with MT-GS models for all environments compared to grain yield, with  
423 2014 observing the largest increase (**Figure 2 and 3**). The maximum prediction accuracy for  
424 grain protein content was 0.62 in 2014 with RF, 0.56 in 2015 with MLP, and 0.61 in 2016 with  
425 RF MT-GS models (**Figure 3**). We observed that similar to grain yield, MT-GS model for CNN  
426 resulted in the lowest increase in prediction accuracy.

427  
428 **Performances of multi-trait genomic selection models using individual SRI:** We evaluated  
429 each SRI's relationship with grain protein content and grain yield across all nine MT-GS models  
430 assessed in this study (**Figure 4 and 5**). Inclusion of any SRI in the MT-GS model resulted in  
431 higher prediction accuracy than the UT-GS model for grain protein content and grain yield.  
432 **Figure 4** shows the prediction accuracies for grain protein content for the three environments  
433 with six individual SRIs in the MT-GS models. GNDVI was the best performing index for seven  
434 out of the nine models in each environment (**Figure 4**). RF and MLP resulted in the greatest  
435 improvement in prediction accuracy by including GNDVI in the MT-GS model. SVM was the  
436 only model where GNDVI performed worse than other indices for most environments (**Figure**  
437 **4**). The maximum prediction accuracy for grain protein content in 2014, 2015, and 2016 was  
438 0.67, 0.61, and 0.68, respectively, with RF by inclusion of GNDVI in the MT-GS model.

439 Similarly, the inclusion of individual SRI in the MT-GS models increased prediction accuracy  
440 compared to UT-GS models for grain yield (**Figure 5**). Unlike grain protein content, there was

441 no individual SRI that performed best across all environments and models. The maximum  
442 prediction accuracy for 2014 was 0.72 with inclusion of NWI, 2015 was 0.40 with inclusion of  
443 NDVI, and 2016 was 0.64, with inclusion of NDVI. Overall, we observed that NWI, NDVI, and  
444 GNDVI provide the necessary information for increasing prediction accuracy for grain yield  
445 (**Figure 5**).

446

447 **Independent predictions with uni- and multi-trait genomic selection models:** Independent  
448 predictions involve prediction across environments where models were trained on previous year  
449 datasets, and predictions were made for upcoming years. We used four UT- and MT-GS models,  
450 namely, GBLUP, RF, MLP, and CNN, for the independent predictions as they performed  
451 consistently better with cross-validation for both traits and under all the environments. SVM was  
452 excluded because of its poor performance for both traits. All the Bayesian models performed  
453 similarly, but had less accuracy, so were excluded from independent predictions because of huge  
454 computational time limitations. The machine and deep learning models were approximately four  
455 times faster than the Bayesian models. **Figure 6** shows the results for independent prediction for  
456 both traits using UT- and MT-GS models.

457 There was an increase of 17% and 11% in prediction accuracies for grain yield and grain protein  
458 content with MT-GS over the UT-GS models (**Supplementary Table 5**). RF and MLP  
459 performed consistently better under UT- and MT-GS models to predict grain yield and grain  
460 protein content, closely followed by CNN. The highest average prediction for grain yield and  
461 grain protein content was 0.29 and 0.41 with MLP and RF, compared to 0.20 and 0.34 with the  
462 traditional UT GBLUP model (**Supplementary Table 5**). There was a varied increment in

463 prediction accuracies with different MT-GS models for grain yield and grain protein content, as  
464 depicted in **Figure 6**.

465

#### 466 **Discussion:**

467 Grain yield and grain protein content are highly important target traits in wheat breeding  
468 programs and for other cereal grains. The generally negative correlation between them, along  
469 with lower heritability, creates a problem in efficiently selecting both the traits simultaneously.  
470 GS and high throughput phenotyping have the potential for reducing the challenges associated  
471 with selection for these two traits. GS may increase selection efficiency, reduce the generation  
472 advancement time, and increase selection intensity (Heffner et al., 2010). Similarly, spectral  
473 information from phenomics data allows for indirect selection by using SRI as a proxy indicator.  
474 The increased use of machine and deep learning models in other disciplines has prompted its use  
475 in plant breeding. Several MT selection studies have conducted and demonstrated the potential  
476 for increasing prediction accuracy (Bhatta et al., 2020; Jia & Jannink, 2012). This study  
477 evaluated the potential of MT machine and deep learning models for predicting grain yield and  
478 grain protein content in wheat using spectral information as a secondary trait. The spectral  
479 information acts as a proxy indicator for selection, is correlated with the primary trait of interest,  
480 and has higher heritability. We observed that machine and deep learning models, namely RF and  
481 MLP, resulted in an increased prediction accuracy for both traits when spectral information was  
482 included in MT-GS models.

483

#### 484 **Trait characterization and association**

485 The greatest advantage of MT-GS models is borrowing the information from secondary traits to  
486 increase prediction accuracies for the primary trait (Calus & Veerkamp, 2011). Understanding  
487 the genetic architecture of each traits is the first consideration when developing MT models. The  
488 primary traits of interest in this study were grain yield and grain protein content, which were  
489 evaluated for three years and heritabilities were low to moderate (**Table 1**), suggesting a  
490 considerable influence of non-genetic effects. Lower heritability for grain yield and grain protein  
491 content was expected, as these traits are controlled by a large number of small effect QTLs and  
492 are genetically complex. Similar results were obtained in previous studies for grain yield and  
493 grain protein content (Sun et al., 2017). Secondary traits (SRI used in this study) have high  
494 heritability and correlate positively with the primary traits (**Table 2**). Furthermore, the collection  
495 of SRI is easy and could be performed using high-throughput techniques (Sankaran et al., 2015).  
496 This suggested that their inclusion in MT-GS models may improve prediction accuracy, increase  
497 selection intensity, and lead to faster breeding cycles (Crain et al., 2018).

498 GNDVI was the best performing index for seven out of nine models evaluated in this  
499 study, and could be a useful proxy index for selecting grain protein content in breeding  
500 programs. Association of GNDVI with nitrogen status and translocation is related to the increase  
501 in prediction accuracies for grain protein content in the MT-GS models (Gitelson et al., 1996).  
502 The high correlation of primary traits with SRI indicates a direct connection between them.  
503 Grain protein content has a lower heritability value than GNDVI, and hence a lesser amount of  
504 variation is accounted by GS models for grain protein content under the UT-GS model. The  
505 higher accuracy observed in MT-GS models can be attributed to capturing more genetic  
506 variation, as GNDVI is genetically correlated with grain protein content. Grain protein content  
507 had the highest correlation with GNDVI, which measures reflection from the green region (550

508 nm) of the plant vegetation spectrum and provides information about the plant's nitrogen status  
509 (Gitelson et al., 1996). Another advantage of using GNDVI is that it allows the prediction of  
510 grain protein content earlier in the selection pipeline, saving the time, cost, and effort to harvest  
511 and collect data from a large number of field plots. Using GNDVI also aids in improving MT-GS  
512 models, which can be used early in the selection pipeline to select improved lines for  
513 advancement in the breeding program.

514         Grain yield is a complex trait resulting from a myriad of interactions, including nutrient  
515 status, water availability, biotic and abiotic stress. Three SRI, namely NWI, NDVI, and GNDVI,  
516 resulted in the highest prediction accuracy for grain yield under the MT-GS models. These  
517 indices each measure a part of NIR (900-970 nm), and this spectrum determines the water status  
518 and biomass of the plants, suggesting NIR is useful for predicting grain yield, especially in the  
519 Pacific Northwest US, where wheat is grown under dryland conditions. Identifying multiple SRI  
520 that increase prediction accuracy provided insight that model analysis should not rely on a single  
521 SRI in each year. Expression of several physiological processes in plants is dependent upon the  
522 plants genetic makeup, factors like light, temperature, humidity, day length, etc, and the growth  
523 stage when the plant experiences stress. Different SRI are able to capture these various genotype  
524 by environment interactions, along with environmental variation that may exist from year to  
525 year, which contribute to final grain yield estimations. The inclusion of multiple SRI in the  
526 model helps explain the unknown variance component ignored in UT-GS models. We were able  
527 to identify the three SRI that are more influential for predicting grain yield out of the six SRI  
528 explored. Using these three SRI will reduce computation time and cost for data management to  
529 make selections.

530



## 531 **Potential of the machine and deep learning models in a breeding program**

532 This study aimed to explore machine and deep learning potential in wheat breeding  
533 programs using MT-GS models. Deep learning is a new machine learning branch using a dense  
534 network of neurons to explore the dataset's complicated hidden relationship. We concluded that  
535 MT random forest and multilayer perceptron resulted in an improvement of 23-31% prediction  
536 accuracy for both traits under cross-validation and independent prediction compared to the  
537 GBLUP and Bayesian models. Similar results were obtained by Ma et al. (2018) for predicting  
538 grain yield, plant height, and grain length in wheat using UT-deep learning models and rrBLUP.  
539 Their study demonstrated potential for the utilization of deep learning models in plant breeding.  
540 Deep learning based GS models gave 0-5% higher prediction accuracies for various agronomic  
541 traits in wheat in our previous work (Sandhu et al., 2021a). Montesinos-López et al. (2018b)  
542 concluded that deep learning models were superior for six out of nine traits evaluated in maize  
543 and wheat over the traditional GBLUP. Additionally, Montesinos-López et al. (2018a) showed  
544 that MT deep learning models performed superior to the MT Bayesian models when genotype by  
545 environment interaction was not included for predicting grain yield in wheat. These results open  
546 up a new path for improved breeding selection, that could translate into higher rates of genetic  
547 gain.

548 Machine and deep learning models, unlike Bayesian models, are highly flexible for  
549 mapping complex interactions present between predictors and responses, and thereby  
550 interpreting the trend of the current dataset (Liu et al., 2019). Bayesian models often include  
551 selection of a specific subset of markers which explain the most variation in the response, in  
552 contrast to machine and deep learning models, that explore the whole data space during model  
553 training (Pérez & Campos, 2014). As grain yield and grain protein content are polygenic, relying

554 on Bayesian models might not be a good strategy, as it is often unknown how many QTLs are  
555 present in a particular population and are expressing under the specific environment. Hence,  
556 machine and deep learning models are suitable for complex traits as they explore all possible  
557 relationships between markers and traits. Machine and deep learning models also account for  
558 interactions among predictors and remove redundant information using filters, nodes, or neurons  
559 (Crossa et al., 2019), and modelling of this interaction is especially important for MT models  
560 when primary and secondary traits are correlated. Our results confirm this, obtaining the highest  
561 prediction accuracy with a MT-MLP model, compared to a UT-MLP model. The neuron weight  
562 updates in the hidden layers leads to a combination of attributes for capturing the most suitable  
563 hierarchical representation. Similarly, random forest development uses independent tree  
564 branches, and the conclusion is based on the forest's average with individual tree branches being  
565 uncorrelated, instead of any one individual branch (Waldmann, 2016). In this way, both random  
566 forest and MLP models are an improvement for mapping complex interactions and resulted in  
567 the highest prediction accuracy for both grain protein content and grain yield in this study.

568 The computation time increased linearly with inclusion of more variables such as SRI in  
569 this study for MT GBLUP and Bayesian models; however, MT machine and deep learning  
570 models are well developed for parallelism in computation (Lecun et al., 2015). We observed that  
571 MT machine and deep learning models were four times faster than the MT Bayesian models, due  
572 to their capacity to parallelize the operations. With the continuous increase in secondary traits  
573 owing to utilization of high throughput phenotyping tools in the breeding program, breeders need  
574 to shift from traditional Bayesian models to more computationally efficient models, and machine  
575 and deep learning models provide a new avenue in this regard. Grain yield and grain protein  
576 content had different heritability in each environment, with 2015 being lowest. The MT machine

577 and deep learning models resulted in the maximum increase in prediction accuracy for both traits  
578 in the 2015 environment, showing that these models are also superior for lower heritability traits  
579 or environments, which is often seen in plants (González-Camacho et al., 2018).

580  
581 It is a misconception that machine and deep learning models should be used only on large  
582 datasets having thousands of individuals, which is difficult for traits like grain yield or grain  
583 protein content which are evaluated at mid to late stages in breeding programs (Angermueller et  
584 al., 2016). However, our results and other related work indicate that machine and deep learning  
585 models have similar or higher performance compared to traditional GBLUP and Bayesian  
586 models when using data from hundreds of individuals for model training (Zingaretti et al., 2020).  
587 Furthermore, a large dataset with 100k individuals was used for predictions with deep learning  
588 models in the GS context and did not observe any superiority over the traditional linear mixed  
589 models (Bellot et al., 2018). Zingaretti et al. (2020) and Montesinos-López et al. (2018a)  
590 demonstrated deep learning models have higher prediction accuracy than GBLUP and other  
591 mixed models when using 1233 strawberry and 250 wheat genotypes. These results, combined  
592 with ours, suggest that training population size plays a minor role compared to the genetic  
593 architecture of the trait and secondary traits utilized in the models. However, adequate training  
594 population sizes remain important in GS.

595 The main issue with machine and deep learning models is the lack of biological  
596 significance as different hyperparameters in the models handle different data parts. These models  
597 might not be useful in providing genetic insight for the primary and secondary traits employed,  
598 and hence genome-wide association studies are an important complement. Furthermore,  
599 compared to GBLUP, machine and deep learning models were computationally intensive

600 because of the extra step of hyperparameter optimization. Hyperparameter optimization is  
601 required separately for each trait and could significantly discourage users when results are  
602 needed quickly in breeding programs for making selections (Cho & Hegde, 2019). Plant breeders  
603 are often interested in each predictor's significance in the models, which is not possible in deep  
604 learning because of their black-box nature due to many hidden layers, neurons, and filters.  
605 Finally, machine and deep learning model implementation requires a sufficient background in  
606 computer science, mathematics, and machine learning, which will require additional efforts by  
607 plant breeders, or accomplished through efficient collaborations. Although there are some  
608 potential hindrances in implementing machine and deep learning models, their utilization can  
609 result in the improvement of prediction accuracy for complex traits of interest in breeding  
610 programs. Overall, this study presents the benefits to utilizing MT machine and deep learning  
611 models for predicting complex traits under selection while efficiently using spectral information.

612

613 **Conclusion:** In this study, we evaluated the potential of MT machine and deep learning models  
614 for predicting grain yield and grain protein content using spectral information in a wheat  
615 breeding program. The model's performances were compared with traditional UT and MT  
616 GBLUP and Bayesian models under cross-validation and independent predictions. Our results  
617 showed the vast potential for MT machine and deep learning models with spectral information as  
618 a proxy phenotype. Random forest and multilayer perceptron were the best performing models  
619 for both traits under all the evaluated scenarios, closely followed by convolutional neural  
620 network and GBLUP. Green normalized difference vegetation index was the best SRI for  
621 predicting grain protein content for most MT models under cross-validation and independent  
622 predictions. Furthermore, machine and deep learning models were competitive with Bayesian

623 models as they were less computationally intensive than Bayesian models. This and previous  
624 studies on deep learning for predicting complex traits shows enormous potential for the  
625 utilization of these models in plant breeding programs to enhance genetic gain for quantitative  
626 traits.

627

### 628 **Conflict of Interest**

629 The authors declare no conflict of interest.

630

### 631 **Authors contributions**

632 KS: conceptualized the idea, analyzed data, and drafted the manuscript; SP: assisted in data  
633 analysis and edited the manuscript; MP: conducted field trials, edited the manuscript and  
634 obtained the funding for the project; AC: supervised the study, conducted field trials, edited the  
635 manuscript and obtained the funding for the project.

636

### 637 **Funding**

638 This project was supported by the Agriculture and Food Research Initiative Competitive Grant  
639 2017-67007-25939 (WheatCAP) and 2016-68004-24770 from the USDA National Institute of  
640 Food and Agriculture and Hatch project 1014919.

641

### 642 **References**

643 Abdollahi-Arpanahi, R., Gianola, D., & Peñagaricano, F. (2020). Deep learning versus

- 644 parametric and ensemble methods for genomic prediction of complex phenotypes. *Genetics*  
645 *Selection Evolution*, 52(1), 12. <https://doi.org/10.1186/s12711-020-00531-z>
- 646 Aguate, F. M., Trachsel, S., González Pérez, L., Burgueño, J., Crossa, J., Balzarini, M., ... de los  
647 Campos, G. (2017). Use of hyperspectral image data outperforms vegetation indices in  
648 prediction of maize yield. *Crop Science*, 57(5), 2517–2524.  
649 <https://doi.org/10.2135/cropsci2017.01.0007>
- 650 Angermueller, C., Pärnamaa, T., Parts, L., & Stegle, O. (2016). Deep learning for computational  
651 biology. *Molecular Systems Biology*, 12(7), 878. <https://doi.org/10.15252/msb.20156651>
- 652 Gulli, A., and Pal, S. (2017). Deep learning with keras. Birmingham: Packt Publishing Ltd.
- 653 Aravind, J., Sankar, S. M., Wankhede, D. P., Kaur, V. (2020). augmentedRCBD: analysis of  
654 augmented randomised complete block designs. R package version 0.1.3.  
655 <https://doi.org/10.2307/2527837>
- 656 Babar, M. A., Reynolds, M. P., Van Ginkel, M., Klatt, A. R., Raun, W. R., & Stone, M. L.  
657 (2006). Spectral reflectance to estimate genetic variation for in-season biomass, leaf  
658 chlorophyll, and canopy temperature in wheat. *Crop Science*, 46(3), 1046–1057.  
659 <https://doi.org/10.2135/cropsci2005.0211>
- 660 Barmeier, G., Hofer, K., & Schmidhalter, U. (2017). Mid-season prediction of grain yield and  
661 protein content of spring barley cultivars using high-throughput spectral sensing. *European*  
662 *Journal of Agronomy*, 90, 108–116. <https://doi.org/10.1016/j.eja.2017.07.005>
- 663 Bates, D., Mächler, M., Bolker, B. M., & Walker, S. C. (2015). Fitting linear mixed-effects  
664 models using lme4. *Journal of Statistical Software*, 67(1).  
665 <https://doi.org/10.18637/jss.v067.i01>
- 666 Bellot, P., de los Campos, G., & Pérez-Enciso, M. (2018). Can deep learning improve genomic  
667 prediction of complex human traits? *Genetics*, 210(3), 809–819.  
668 <https://doi.org/10.1534/genetics.118.301298>
- 669 Bhatta, M., Gutierrez, L., Cammarota, L., Cardozo, F., Germán, S., Gómez-Guerrero, B., ...  
670 Castro, A. J. (2020). Multi-trait genomic prediction model increased the predictive ability  
671 for agronomic and malting quality traits in barley (*Hordeum vulgare* L.). *G3: Genes,*  
672 *Genomes, Genetics*, 10(3), 1113–1124. <https://doi.org/10.1534/g3.119.400968>
- 673 Blake, N. K., Pumphrey, M., Glover, K., Chao, S., Jordan, K., Jannick, J. L., ... Talbert, L. E.  
674 (2019). Registration of the triticeae-cap spring wheat nested association mapping  
675 population. *Journal of Plant Registrations*, 13(2), 294–297.  
676 <https://doi.org/10.3198/jpr2018.07.0052crmp>
- 677 Calus, M. P., & Veerkamp, R. F. (2011). Accuracy of multi-trait genomic selection using  
678 different methods. *Genetics Selection Evolution*, 43(1), 26. <https://doi.org/10.1186/1297-9686-43-26>
- 680 Cho, M., & Hegde, C. (2019). "Reducing the search space for hyperparameter optimization using  
681 group sparsity" in *ICASSP, IEEE International Conference on Acoustics, Speech and Signal*  
682 *Processing - Proceedings* (Vol. 2019-May, pp. 3627–3631). Institute of Electrical and  
683 Electronics Engineers Inc. <https://doi.org/10.1109/ICASSP.2019.8682434>

- 684 Crain, J., Mondal, S., Rutkoski, J., Singh, R. P., & Poland, J. (2018). Combining high-throughput  
685 phenotyping and genomic information to increase prediction and selection accuracy in  
686 wheat breeding. *The Plant Genome*, *11*(1), 170043.  
687 <https://doi.org/10.3835/plantgenome2017.05.0043>
- 688 Crossa, J., Martini, J. W., Gianola, D., Pérez-Rodríguez, P., Jarquin, D., Juliana, P., ... Cuevas, J.  
689 (2019). Deep kernel and deep learning for genome-based prediction of single yraits in  
690 multienvironment breeding trials. *Frontiers in Genetics*, *10*, 1168.  
691 <https://doi.org/10.3389/fgene.2019.01168>
- 692 de los Campos, G., and Grüneberg, A. (2016). MTM (multi-trait model) package,  
693 <http://quantgen.github.io/MTM/vignette.html> (accessed 10.20.2020).
- 694 Endelman, J. B. (2011). Ridge regression and other kernels for genomic selection with R  
695 package rrBLUP. *The Plant Genome*, *4*, 250–255.  
696 <https://doi.org/10.3835/plantgenome2011.08.0024>
- 697 Fisher, R. A. (1918). The correlation between relatives on the supposition of Mendelian  
698 Inheritance. *Royal Sociey of Edinburgh*, *52*, 399–433.
- 699 Gianola, D., Fernando, R. L., & Stella, A. (2006). Genomic-assisted prediction of genetic value  
700 with semiparametric procedures. *Genetics*, *173*(3), 1761–1776.  
701 <https://doi.org/10.1534/genetics.105.049510>
- 702 Gitelson, A. A., Kaufman, Y. J., & Merzlyak, M. N. (1996). Use of a green channel in remote  
703 sensing of global vegetation from EOS- MODIS. *Remote Sensing of Environment*, *58*(3),  
704 289–298. [https://doi.org/10.1016/S0034-4257\(96\)00072-7](https://doi.org/10.1016/S0034-4257(96)00072-7)
- 705 Gizaw, S. A., Godoy, J. G. V., Garland-Campbell, K., & Carter, A. H. (2018). Using spectral  
706 reflectance indices as proxy phenotypes for genome-wide association studies of yield and  
707 yield stability in pacific northwest winter wheat. *Crop Science*, *58*(3), 1232–1241.  
708 <https://doi.org/10.2135/cropsci2017.11.0710>
- 709 González-Camacho, J. M., Ornella, L., Pérez-Rodríguez, P., Gianola, D., Dreisigacker, S., &  
710 Crossa, J. (2018). Applications of machine learning methods to genomic selection in  
711 breeding wheat for rust resistance. *The Plant Genome*, *11*(2), 170104.  
712 <https://doi.org/10.3835/plantgenome2017.11.0104>
- 713 Habyarimana, E., Franceschi, P. De, Ercisli, S., & Baloch, F. S. (2020). Genome-wide  
714 association study for biomass related traits in a panel of sorghum bicolor and S . bicolor × S  
715 . halepense populations. *Frontiers in Plant Science*, *11*, 551305.  
716 <https://doi.org/10.3389/fpls.2020.551305>
- 717 Hastie, T., Tibshirani, R., & Friedman, J. (2009). *The elements of statistical learning: data*  
718 *mining, inference, and prediction*. Springer Science & Buisness Media.
- 719 Heffner, E. L., Lorenz, A. J., Jannink, J. L., & Sorrells, M. E. (2010). Plant breeding with  
720 genomic selection: gain per unit time and cost. *Crop Science*, *50*(5), 1681–1690.  
721 <https://doi.org/10.2135/cropsci2009.11.0662>
- 722 Jia, Y., & Jannink, J. L. (2012). Multiple-trait genomic selection methods increase genetic value  
723 prediction accuracy. *Genetics*, *192*(4), 1513–1522.

- 724 <https://doi.org/10.1534/genetics.112.144246>
- 725 Jordan, K. W., Wang, S., He, F., Chao, S., Lun, Y., Paux, E., Sourdille, P., ... Akhunov, E. D.  
726 (2018). The genetic architecture of genome-wide recombination rate variation in  
727 allopolyploid wheat revealed by nested association mapping. *The Plant Journal*, 95(6),  
728 1039–1054. <https://doi.org/10.1111/tpj.14009>
- 729 Koch, P., Wujek, B., Golovidov, O., & Gardner, S. (2017). "Automated hyperparameter tuning  
730 for effective machine learning" in *Proceedings of the SAS Global Forum 2017 Conference*.  
731 Carry, NC, 1–23.
- 732 Large, E. C. (1954). Growth stages in cereals illustratin of the feeks scale. *Plant Pathology*, 3(4),  
733 128–129. <https://doi.org/10.1111/j.1365-3059.1954.tb00716.x>
- 734 Lecun, Y., Bengio, Y., & Hinton, G. (2015). Deep learning. *Nature*, 521, 436-444.  
735 <https://doi.org/10.1038/nature14539>
- 736 Liu, Y., Wang, D., He, F., Wang, J., Joshi, T., & Xu, D. (2019). Phenotype prediction and  
737 genome-wide association study using deep convolutional neural network of soybean.  
738 *Frontiers in Genetics*, 10, 1091. <https://doi.org/10.3389/fgene.2019.01091>
- 739 Lozada, D. N., & Carter, A. H. (2019). Accuracy of single and multi-trait genomic prediction  
740 models for grain yield in US Pacific Northwest winter wheat. *Crop Breeding, Genetics and*  
741 *Genomics*, 1(1), e190012. <https://doi.org/10.20900/cbagg20190012>
- 742 Ma, W., Qiu, Z., Song, J., Li, J., Cheng, Q., Zhai, J., & Ma, C. (2018). A deep convolutional  
743 neural network approach for predicting phenotypes from genotypes. *Planta*, 248(5), 1307–  
744 1318. <https://doi.org/10.1007/s00425-018-2976-9>
- 745 McKay, M.D. (1992). "Latin hypercube sampling as a tool in uncertainty analysis of computer  
746 models" in *Proceedings of the 24th Conference on Winter Simulation*; December 1992;  
747 557–564.
- 748 Meuwissen, T. H. E., Hayes, B. J., & Goddard, M. E. (2001). Prediction of total genetic value  
749 using genome-wide dense marker maps. *Genetics*, 157(4), 1819–1829.
- 750 Montesinos-López, A., Montesinos-López, O. A., Gianola, D., Crossa, J., & Hernández-Suárez,  
751 C. M. (2018a). Multi-environment genomic prediction of plant traits using deep learners  
752 with dense architecture. *G3: Genes, Genomes, Genetics*, 8(12), 3813–3828.  
753 <https://doi.org/10.1534/g3.118.200740>
- 754 Montesinos-López, O. A., Martín-Vallejo, J., Crossa, J., Gianola, D., Hernández-Suárez, C. M.,  
755 Montesinos-López, A., ... Singh, R. (2019a). A benchmarking between deep learning,  
756 support vector machine and Bayesian threshold best linear unbiased prediction for  
757 predicting ordinal traits in plant breeding. *G3: Genes, Genomes, Genetics*, 9(2), 601–618.  
758 <https://doi.org/10.1534/g3.118.200998>
- 759 Montesinos-López, O. A., Martín-Vallejo, J., Crossa, J., Gianola, D., Hernández-Suárez, C. M.,  
760 Montesinos-López, A., ... Singh, R. (2019b). New deep learning genomic-based prediction  
761 model for multiple traits with binary, ordinal, and continuous phenotypes. *G3: Genes,*  
762 *Genomes, Genetics*, 9(5), 1545-1556. <https://doi.org/10.1534/g3.119.300585>



- 763 Montesinos-López, O. A., Montesinos-López, A., Crossa, J., Gianola, D., Hernández-Suárez, C.  
764 M., & Martín-Vallejo, J. (2018b). Multi-trait, multi-environment deep learning modeling for  
765 genomic-enabled prediction of plant traits. *G3: Genes, Genomes, Genetics*, 8(12), 3829–  
766 3840. <https://doi.org/10.1534/g3.118.200728>
- 767 Montesinos-López, O. A., Montesinos-López, A., Crossa, J., Toledo, F. H., Pérez-Hernández, O.,  
768 Eskridge, K. M., & Rutkoski, J. (2016). A genomic bayesian multi-trait and multi-  
769 environment model. *G3: Genes, Genomes, Genetics*, 6(9), 2725–2774.  
770 <https://doi.org/10.1534/g3.116.032359>
- 771 Pedregosa, F., Michel, V., Grisel, O., Blondel, M., Prettenhofer, P., Weiss, R., ... Duchesnay, E.  
772 (2011). Scikit-learn: machine learning in python. *Journal of Machine Learning Research*,  
773 12, 2825-2830.
- 774 Peñuelas, J., Gamon, J. A., Fredeen, A. L., Merino, J., & Field, C. B. (1994). Reflectance indices  
775 associated with physiological changes in nitrogen- and water-limited sunflower leaves.  
776 *Remote Sensing of Environment*, 48(2), 135–146. [https://doi.org/10.1016/0034-](https://doi.org/10.1016/0034-4257(94)90136-8)  
777 [4257\(94\)90136-8](https://doi.org/10.1016/0034-4257(94)90136-8)
- 778 Pérez-Enciso, M., & Zingaretti, L. M. (2019). A guide for using deep learning for complex trait  
779 genomic prediction. *Genes*, 10(7), 553. <https://doi.org/10.3390/genes10070553>
- 780 Pérez, P., & De Los Campos, G. (2014). Genome-wide regression and prediction with the BGLR  
781 statistical package. *Genetics*, 198(2), 483–495. <https://doi.org/10.1534/genetics.114.164442>
- 782 Poland, J. A., & Rife, T. W. (2012). Genotyping-by-sequencing for plant breeding and genetics.  
783 *The Plant Genome*, 5(3), 92–102. <https://doi.org/10.3835/plantgenome2012.05.0005>
- 784 Pook, T., Freudenthal, J., Korte, A., & Simianer, H. (2020). Using local convolutional neural  
785 networks for genomic prediction. *Frontiers in Genetics*, 11, 561497.  
786 <https://doi.org/10.3389/fgene.2020.561497>
- 787 Prasad, B., Carver, B. F., Stone, M. L., Babar, M. A., Raun, W. R., & Klatt, A. R. (2007).  
788 Genetic analysis of indirect selection for winter wheat grain yield using spectral reflectance  
789 indices. *Crop Science*, 47(4), 1416–1425. <https://doi.org/10.2135/cropsci2006.08.0546>
- 790 R Core Team. (2017). A language and environment for statistical computing. Vienna, Austria: R  
791 foundation for statistical computing. Retrieved from <https://www.R-project.org/>.
- 792 Rouse Jr, J.W., Haas R. H., Deering, D. W. & Schell, J. A. (1972). Monitoring vegetation  
793 systems in the Great Plains with ERTS. In: S.C. Freden, et al., editors, Third Earth  
794 Resources Technology Satellite-I Symposium. Washington, DC.
- 795 Samuel A.L. (1959). Some studies in machine learning. *IBM Journal of Research and*  
796 *Development*, 44(1.2). doi: 10.1147/rd.441.0206
- 797 Sandhu, K. S., Lozada, D. N., Zhang, Z., Pumphrey, M. O., & Carter, A. H. (2021a). Deep  
798 learning for predicting complex traits in spring wheat breeding program. *Frontiers in Plant*  
799 *Science*, 11, 613325. <https://doi.org/10.3389/fpls.2020.613325>
- 800 Sandhu, K. S., Mihalyov, P. D., Lewien, M. J., Pumphrey, M. O., & Carter, A. H. (2021b).  
801 Combining genomic and phenomic information for predicting grain protein content and

- 802 grain yield in spring wheat. *Frontiers in Plant Science*, 12, 170.  
803 <https://doi.org/10.3389/fpls.2021.613300>
- 804 Sankaran, S., Khot, L. R., & Carter, A. H. (2015). Field-based crop phenotyping: multispectral  
805 aerial imaging for evaluation of winter wheat emergence and spring stand. *Computers and*  
806 *Electronics in Agriculture*, 118, 372–379. <https://doi.org/10.1016/j.compag.2015.09.001>
- 807 SAS Institute Inc 2011. MP Genomics. Release 6.0. SAS Inst., Cary, NC.
- 808 Shengqiang, Z., Dekkers, J. C. M., Fernando, R. L., & Jannink, J. L. (2009). Factors affecting  
809 accuracy from genomic selection in populations derived from multiple inbred lines: A  
810 barley case study. *Genetics*, 182(1), 355–364. <https://doi.org/10.1534/genetics.108.098277>
- 811 Smith, P. F., Ganesh, S., & Liu, P. (2013). A comparison of random forest regression and  
812 multiple linear regression for prediction in neuroscience. *Journal of Neuroscience Methods*,  
813 220(1), 85–91. <https://doi.org/10.1016/j.jneumeth.2013.08.024>
- 814 Smola, A., & Scholkopf, B. (2004). A tutorial on support vector regression. *Statistics and*  
815 *Computing*, 14, 199–222.
- 816 Srivastava, N., Hinton, G., Krizhevsky, A., & Salakhutdinov, R. (2014). Dropout: a simple way  
817 to prevent neural networks from overfitting. *Journal of Machine Learning Research*,  
818 15(56), 1929-1958. <https://doi.org/10.5555/2627435.2670313>
- 819 Sun, J., Poland, J. A., Mondal, S., Crossa, J., Juliana, P., Singh, R. P., ... Sorrells, M. E. (2019).  
820 High-throughput phenotyping platforms enhance genomic selection for wheat grain yield  
821 across populations and cycles in early stage. *Theoretical and Applied Genetics*, 132(6),  
822 1705–1720. <https://doi.org/10.1007/s00122-019-03309-0>
- 823 Sun, J., Rutkoski, J. E., Poland, J. A., Crossa, J., Jannink, J., & Sorrells, M. E. (2017). Multitrait,  
824 random regression, or simple repeatability model in high-throughput phenotyping data  
825 improve genomic prediction for wheat grain yield. *The Plant Genome*, 10(2), 1-12.  
826 <https://doi.org/10.3835/plantgenome2016.11.0111>
- 827 Tishbirani, R. (1996). Regression shrinkage and selection via the Lasso. *Journal of the Royal*  
828 *Statistical Society. Series B (Methodological)*, 58(1), 267-288.  
829 <https://doi.org/10.1111/j.2517-6161.1996.tb02080.x>
- 830 VanRaden, P. M. (2008). Efficient methods to compute genomic predictions. *Journal of Dairy*  
831 *Science*, 91(11), 4414–4423. <https://doi.org/10.3168/jds.2007-0980>
- 832 Vapnik, V. (2013). The nature of statistical learning theory. Springer science & business media.
- 833 Voyant, C., Notton, G., Kalogirou, S., Nivet, M. L., Paoli, C., Motte, F., & Fouilloy, A. (2017).  
834 Machine learning methods for solar radiation forecasting: A review. *Renewable Energy*,  
835 105, 569-582. <https://doi.org/10.1016/j.renene.2016.12.095>
- 836 Waldmann, P. (2016). Genome-wide prediction using Bayesian additive regression trees.  
837 *Genetics Selection Evolution*, 48(1), 42. <https://doi.org/10.1186/s12711-016-0219-8>
- 838 Waldmann, P., Pfeiffer, C., & Mészáros, G. (2020). Sparse convolutional neural networks for  
839 genome-wide prediction. *Frontiers in Genetics*, 11, 25.

840 <https://doi.org/10.3389/fgene.2020.00025>

841 Zhang, A., Wang, H., Beyene, Y., Semagn, K., Liu, Y., Cao, S., ... Zhang, X. (2017). Effect of  
842 trait heritability, training population size and marker density on genomic prediction  
843 accuracy estimation in 22 bi-parental tropical maize populations. *Frontiers in Plant Science*,  
844 8, 1916. <https://doi.org/10.3389/fpls.2017.01916>

845 Zheng, H., Cheng, T., Li, D., Zhou, X., Yao, X., Tian, Y., ... Zhu, Y. (2018). Evaluation of  
846 RGB, color-infrared and multispectral images acquired from unmanned aerial systems for  
847 the estimation of nitrogen accumulation in rice. *Remote Sensing*, 10(6), 824.  
848 <https://doi.org/10.3390/rs10060824>

849 Zingaretti, L. M., Gezan, S. A., Ferrão, L. F. V., Osorio, L. F., Monfort, A., Muñoz, P. R., ...  
850 Pérez-Enciso, M. (2020). Exploring deep learning for complex trait genomic prediction in  
851 polyploid outcrossing species. *Frontiers in Plant Science*, 11, 25.  
852 <https://doi.org/10.3389/fpls.2020.00025>

853

854

855

**Table 1.** Average phenotypic values and broad sense heritability of grain yield and grain protein content for the three environments (2014-2016).

| Environment | Grain yield      |              | Grain protein content |              |
|-------------|------------------|--------------|-----------------------|--------------|
|             | Phenotype (t/ha) | Heritability | Phenotype (%)         | Heritability |
| 2014        | 2.0              | 0.38         | 14.4                  | 0.57         |
| 2015        | 1.7              | 0.24         | 12.2                  | 0.35         |
| 2016        | 2.4              | 0.40         | 12.6                  | 0.63         |

856

857

**Table 2.** Broad sense heritability of six different spectral reflectance indices obtained for each environment for utilization in multi-trait genomic selection models.

| Environment | NDVI <sup>a</sup> | PRI <sup>b</sup> | NWI <sup>c</sup> | ARI <sup>d</sup> | NCPI <sup>e</sup> | GNDVI <sup>f</sup> |
|-------------|-------------------|------------------|------------------|------------------|-------------------|--------------------|
| 2014        | 0.75              | 0.93             | 0.60             | 0.74             | 0.64              | 0.69               |
| 2015        | 0.66              | 0.81             | 0.60             | 0.56             | 0.55              | 0.64               |
| 2016        | 0.80              | 0.60             | 0.74             | 0.76             | 0.82              | 0.72               |

<sup>a</sup> NDVI, Normalized difference vegetation index; <sup>b</sup> PRI, Photochemical reflectance index; <sup>c</sup> NWI, Normalized water index; <sup>d</sup> ARI, Anthocyanin reflectance index; <sup>e</sup> NCPI, Normalized chlorophyll pigment ratio index; <sup>f</sup> GNDVI, Green normalized difference vegetation index

858

859

**Table 3.** Phenotypic correlation between six different spectral reflectance indices collected at grain filling stage with grain yield and grain protein content for the three environments (2014-2016).

| Trait                 | Environment | NDVI <sup>a</sup> | PRI <sup>b</sup> | NWI <sup>c</sup> | ARI <sup>d</sup> | NCPI <sup>e</sup> | GNDVI <sup>f</sup> |
|-----------------------|-------------|-------------------|------------------|------------------|------------------|-------------------|--------------------|
| Grain yield           | 2014        | 0.33***           | 0.32***          | 0.36***          | -0.16***         | -0.30***          | 0.37***            |
|                       | 2015        | 0.06              | 0.03             | 0.09*            | -0.09*           | -0.12*            | 0.04               |
|                       | 2016        | 0.20***           | 0.15***          | 0.19***          | -0.23***         | -0.18***          | 0.20***            |
| Grain protein content | 2014        | 0.26***           | 0.10             | 0.27***          | -0.12*           | -0.20***          | 0.29***            |
|                       | 2015        | .08*              | 0.01             | -0.03            | 0.27***          | 0.02              | 0.18***            |

2016                      -0.19\*\*\*    -0.10\*                      -0.22\*\*\*    0.12\*                      0.13\*                      -0.15\*\*\*

<sup>a</sup> NDVI, Normalized difference vegetation index; <sup>b</sup> PRI, Photochemical reflectance index; <sup>c</sup> NWI, Normalized water index; <sup>d</sup> ARI, Anthocyanin reflectance index; <sup>e</sup> NCPI, Normalized chlorophyll pigment ratio index; <sup>f</sup> GNDVI, Green normalized difference vegetation index; \*\*\* significant at  $P < 0.0001$ ; \*\* significant at  $P < 0.001$ ; \* significant at  $P < 0.05$

860

861

862

863

864

865

866

867

868

869 **Figure 1.** Outline for multilayer perceptron model with one input, three hidden and an output  
870 layer. The connections between layers are represented with neurons (A). The representation of  
871 convolutional neural network employed in this study is provided with multiple layers (B). Figure  
872 1A was redrawn from code in <http://www.texample.net/tikz/examples/neural-network>.

873 **Figure 2.** Prediction accuracies for grain yield with nine different uni- and multi-trait genomic  
874 selection models under the three different environments (2014-16) (A-C) using five-fold cross-  
875 validation. The x-axis represents the nine genomic selection models with faceting separating the  
876 uni- and multi-trait models.

877 **Figure 3.** Prediction accuracies for grain protein content with nine different uni- and multi-trait  
878 genomic selection model under the three different environments (2014-16) (A-C) using five-fold  
879 cross-validation. The x-axis represents the nine genomic selection models with faceting separates  
880 the uni- and multi-trait models.

881 **Figure 4.** Prediction accuracies for grain protein content for the three environments (A-C) with  
882 inclusion of six different spectral reflectance indices in the nine multi-trait genomic selection  
883 models. The x-axis represents the individual spectral reflectance indices and multi-trait genomic  
884 selection models are separated with facets for comparing across model performances.

885 **Figure 5.** Prediction accuracies for grain yield for the three environments (A-C) with inclusion  
886 of six different spectral reflectance indices in the nine multi-trait genomic selection models. The  
887 x-axis represents the individual spectral reflectance indices and multi-trait genomic selection  
888 models are separated with facets for comparing across model performances.

889 **Figure 6.** Independent prediction accuracies for grain yield (A-C) and grain protein content (D-  
890 F) using four different uni- and multi-trait genomic selection models. The first digit of the year  
891 represents the testing environment, and the second year represents the training environment. The  
892 x axis represents the different models and faceting separate the uni- and multi-trait models.

893

894

895

896

897

898

899

900

901

902

903

904

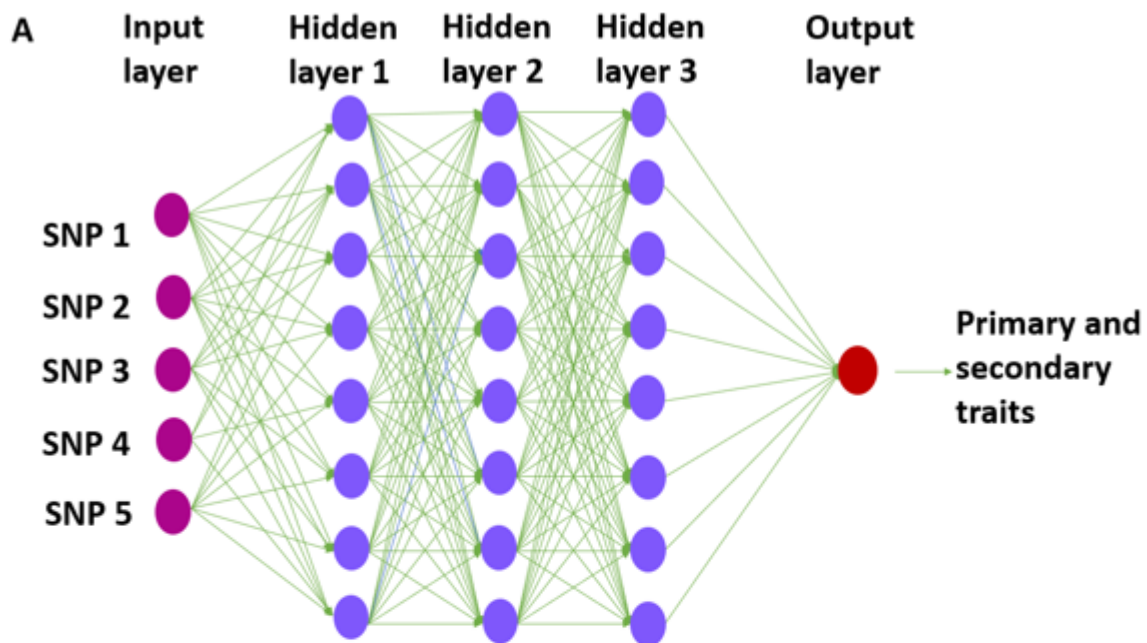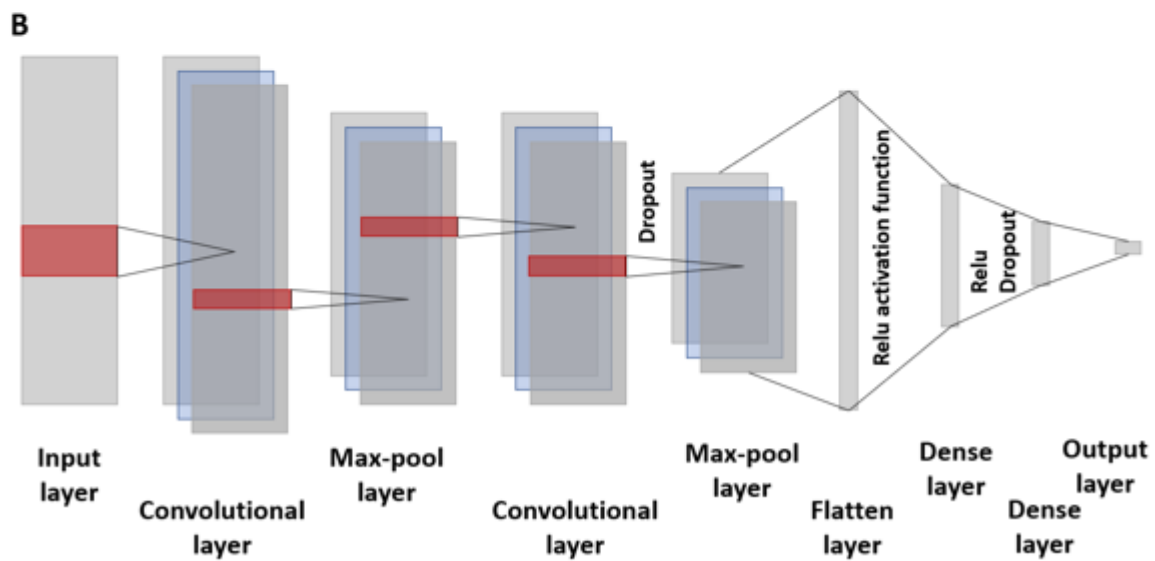

905

906

907

908

909

910

911

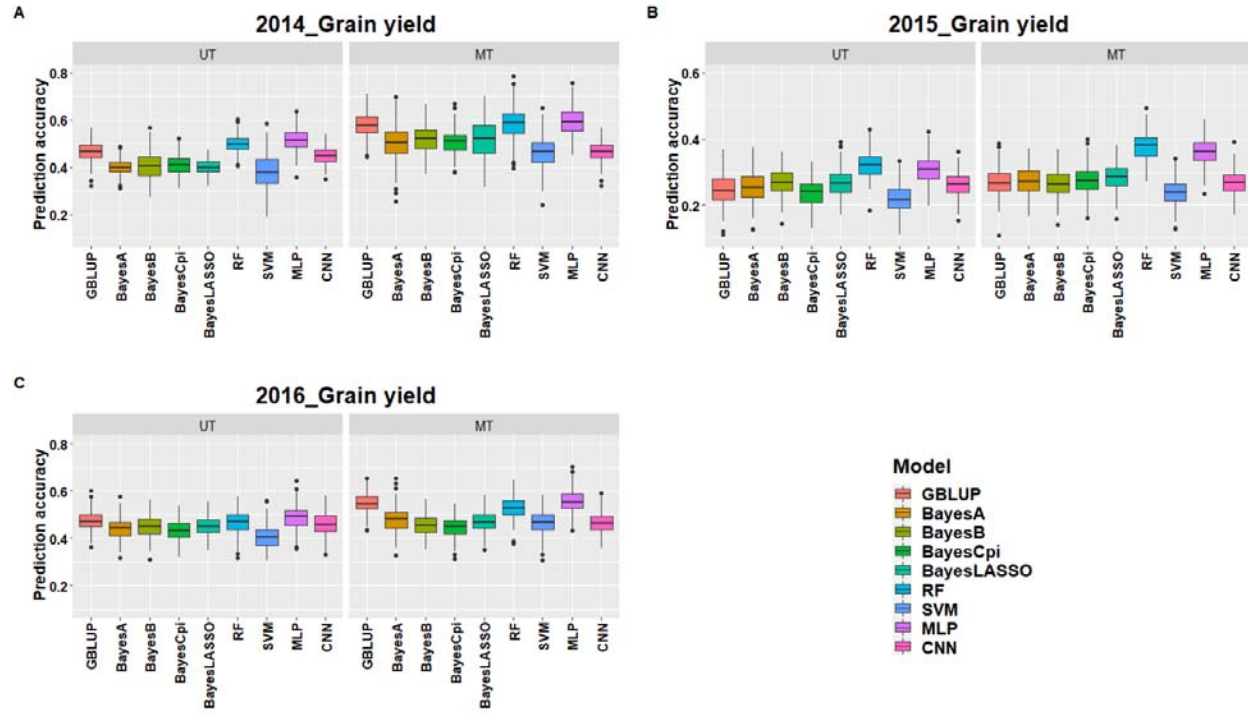

912

913

914

915

916

917

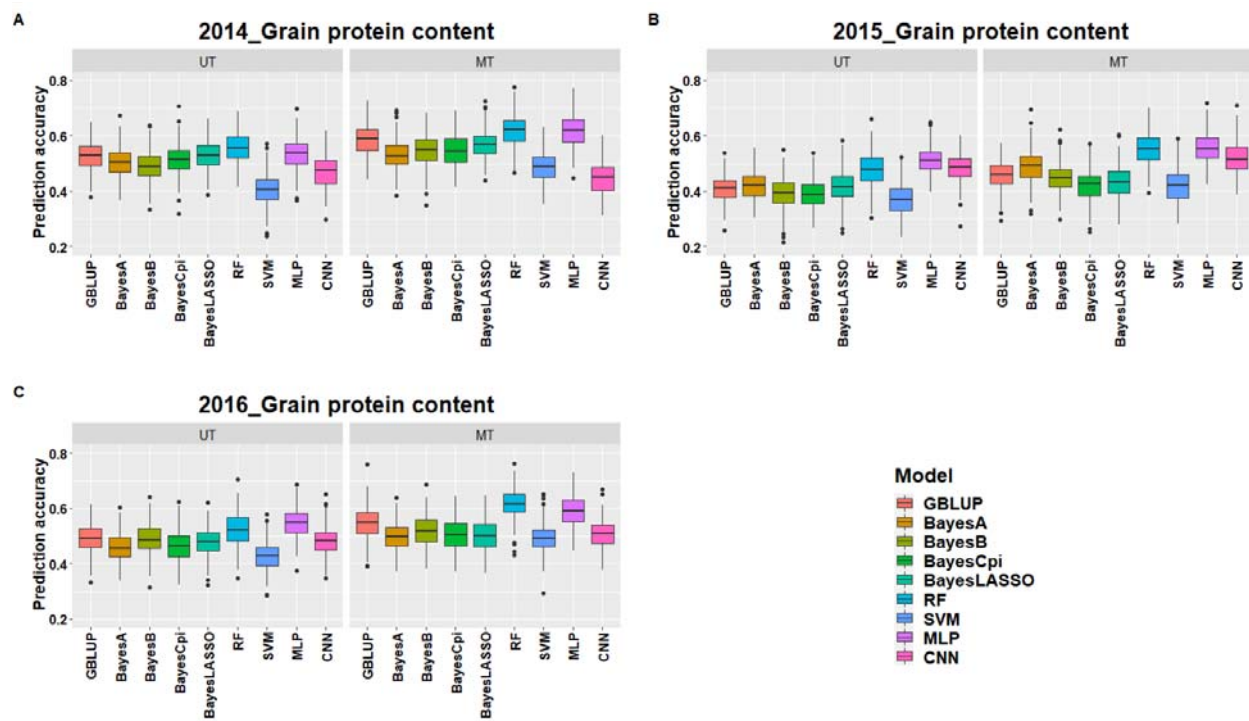

918

919

920

921

922

923

924

925



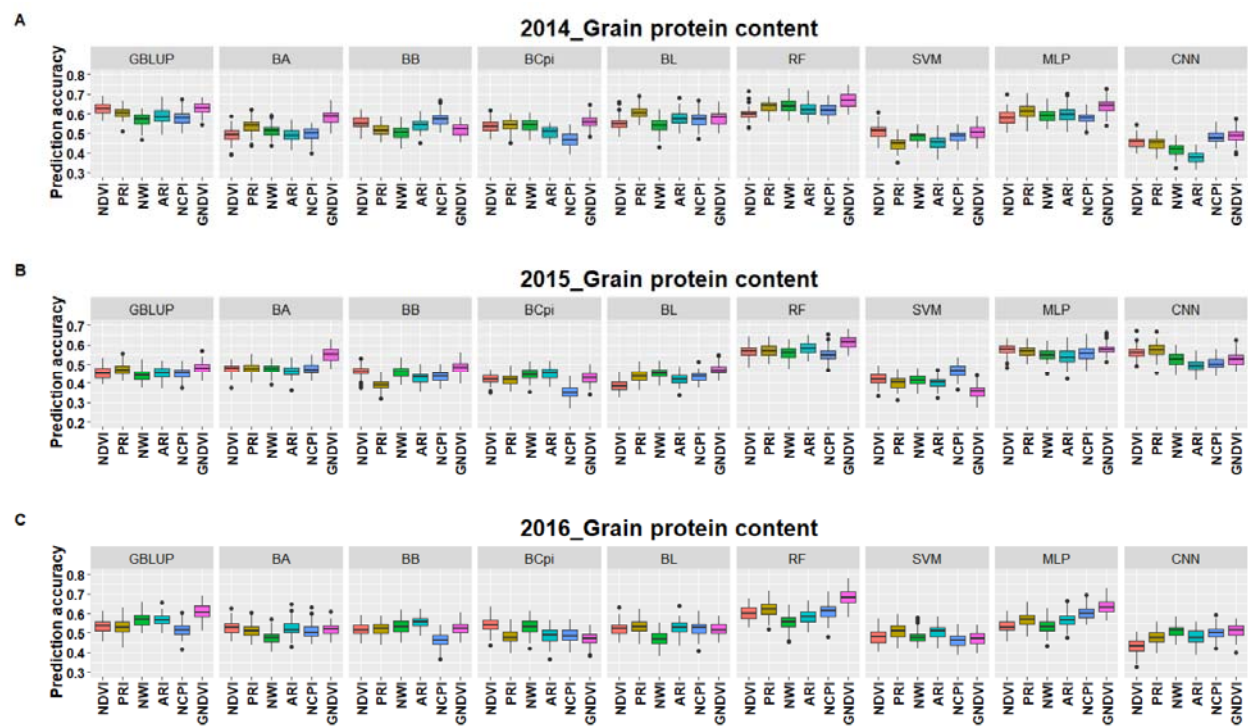

926

927

928

929

930

931

932

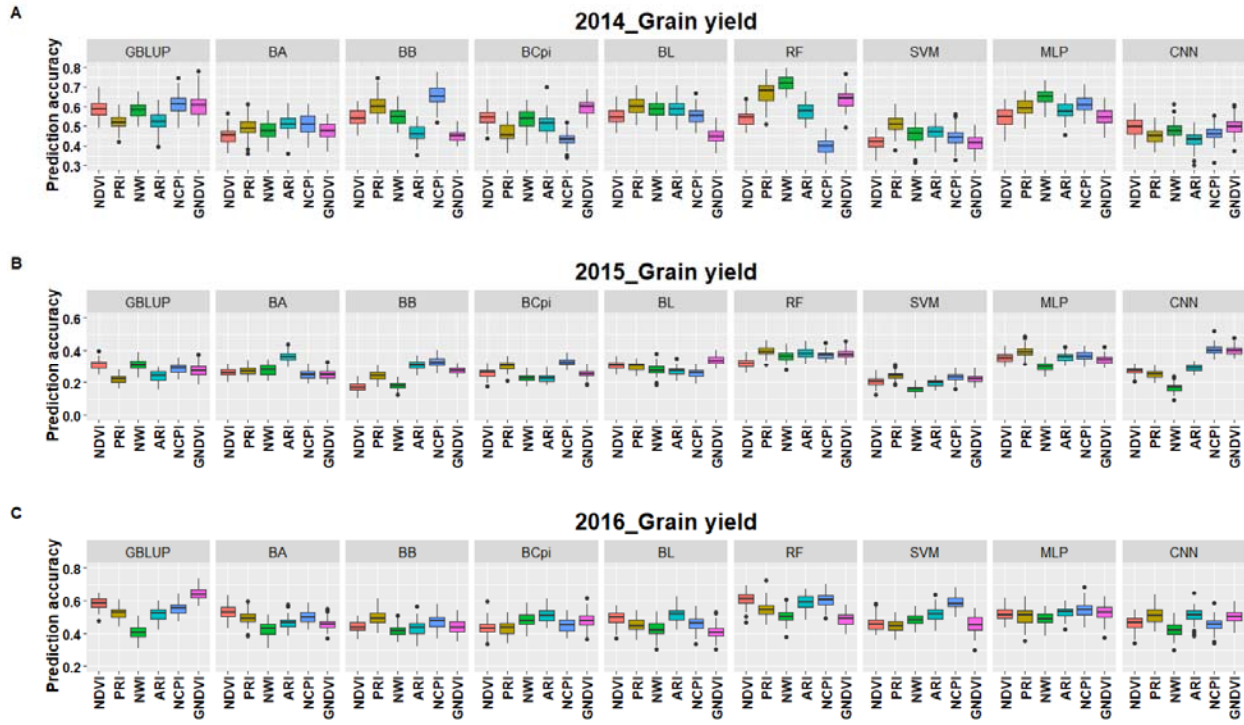

933

934

935

936

937

938

939

940

941

942

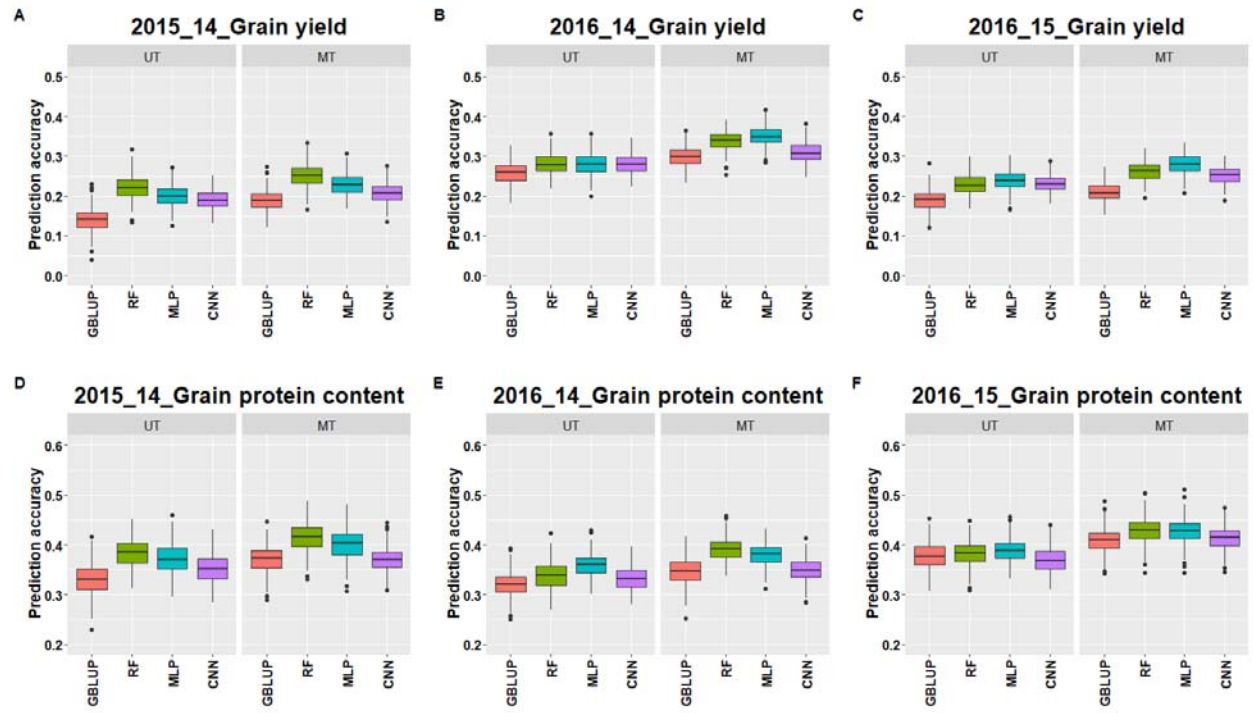

Source: http://biorxiv.org/content/10.1101/2021.04.12.439532v1.full.pdf
